# Supplementary material
Source: PubMed Central journal article supplement (PMC4071158)
Supplement: NIHMS591254-supplement-Supplementary_file_1.pdf [file NIHMS591254-supplement-Supplementary_file_1.pdf]

| Patient number | Age | Sex | Diagnosis*               | Prior Radiation?    | First collection | Second collection | Third Collection | Time of irradiation 1 | Time of irradiation 2, if before sample 3 | Time of Irradiation 3, if before Sample 3 |
|----------------|-----|-----|--------------------------|---------------------|------------------|-------------------|------------------|-----------------------|-------------------------------------------|-------------------------------------------|
| 35             | 53  | F   | NHL                      | No                  | 6:30 AM          | 1:55 AM           | 6:15 AM          | 9:18 AM               | 2:16 PM                                   | 7:14 PM                                   |
| <b>51</b>      | 33  | M   | ALL                      | No                  | 5:50 AM          | 2:25 PM           | 5:30 AM          | 10:19 AM              | 2:34 PM                                   | 8:17 PM                                   |
| 55             | 31  | M   | AML                      | No                  | 5:00 AM          | 1:10 PM           | 5:50 AM          | 8:52 AM               | 1:25 PM                                   | 6:35 PM                                   |
| 57             | 54  | M   | AML                      | No                  | 6:30 AM          | 3:45 PM           | 5:45 AM          | 11:51 AM              | 4:34 PM                                   | 8:20 PM                                   |
| 66             | 42  | M   | AML                      | No                  | 5:30 AM          | 1:10 PM           | 5:45 AM          | 9:06 AM               | 1:17 PM                                   | 6:26 PM                                   |
| 71             | 50  | M   | NHL                      | No                  | 7:00 AM          | 1:13 PM           | 4:50 AM          | 9:18 AM               | 1:25 PM                                   | 6:16 PM                                   |
| 76             | 53  | M   | NHL                      | No                  | 5:00 AM          | 12:30 PM          | 5:20 AM          | 9:04 AM               | 1:22 PM                                   | 6:52 PM                                   |
| 81             | 64  | M   | NHL                      | No                  | 6:00 AM          | 1:50 PM           | 5:00 AM          | 9:12 AM               | 2:10 PM                                   | 6:25 PM                                   |
| 82             | 56  | M   | CML                      | No                  | 5:00 AM          | 1:17 PM           | 6:00 AM          | 9:21 AM               | 1:38 PM                                   | 6:36 PM                                   |
| 84             | 62  | F   | ALL                      | No                  | 5:20 AM          | 12:30 PM          | 5:00 AM          | 8:53 AM               | 1:35 PM                                   | 6:20 PM                                   |
| <b>86</b>      | 43  | M   | AML                      | Yes                 | 6:00 AM          | not drawn         | 6:25 AM          | 9:22 AM               | 2:11 PM                                   | 6:51 PM                                   |
| 90             | 49  | F   | AML                      | No                  | 5:45 AM          | 2:50 PM           | 6:30 AM          | 9:26 AM               | 3:41 PM                                   | 7:44 PM                                   |
| 91             | 53  | M   | AML                      | No                  | 6:20 AM          | 2:40 PM           | 4:45 AM          | 10:12 AM              | 2:56 PM                                   | 8:22 PM                                   |
| 92             | 44  | M   | NHL                      | Yes (testes, 30 Gy) | 6:10 AM          | 1:30 PM           | 6:00 AM          | 9:15 AM               | 1:45 PM                                   | 7:42 PM                                   |
| 94             | 58  | F   | AML                      | No                  | 5:00 AM          | 1:45 PM           | 4:00 AM          | 9:24 AM               | 1:51 PM                                   | 6:05 PM                                   |
| 104            | 23  | M   | ALL                      | No                  | 5:40 AM          | 1:38 PM           | 5:20 AM          | 9:20 AM               | 1:51 PM                                   | 6:11 PM                                   |
| 106            | 39  | F   | AML                      | No                  | 8:30 AM          | 2:10 PM           | 8:00 AM          | 9:15 AM               | 2:41 PM                                   | 7:03 PM                                   |
| 111            | 27  | F   | ALL                      | No                  | 6:00 AM          | 12:55 PM          | 6:00 AM          | 9:16 AM               | 1:36 PM                                   | 6:26 PM                                   |
| 117            | 26  | M   | ALL                      | No                  | 5:00 AM          | 1:30 PM           | 5:00 AM          | 8:46 AM               | 1:54 PM                                   | 6:24 PM                                   |
| 118            | 39  | M   | MDS                      | No                  | 5:00 AM          | 2:45 PM           | 5:00 AM          | 10:45 AM              | 3:39 PM                                   | 8:32 PM                                   |
| 119            | 46  | M   | AML                      | No                  | 6:30 AM          | 2:30 PM           | 5:00 AM          | 9:33 AM               | 3:03 PM                                   | 7:56 PM                                   |
| 128            | 37  | F   | Essential Thrombocytosis | No                  | 5:00 AM          | 1:30 PM           | 5:30 AM          | 9:13 AM               | 2:11 PM                                   | 8:13 PM                                   |
| 131            | 46  | F   | CML                      | No                  | 6:00 AM          | 1:20 PM           | 4:45 AM          | 9:16 AM               | 1:47 PM                                   | 7:09 PM                                   |
| 134            | 21  | F   | ALL                      | No                  | 7:10 AM          | 2:00 PM           | 5:00 AM          | 8:52 AM               | 2:04 PM                                   | 6:40 PM                                   |
| 136            | 63  | M   | CML                      | No                  | 5:30 AM          | 2:30 PM           | 6:00 AM          | 8:49 AM               | 2:58 PM                                   | 7:46 PM                                   |
| 138            | 52  | F   | CML                      | No                  | 5:00 AM          | 2:25 PM           | 4:40 AM          | 9:13 AM               | 2:33 PM                                   | 7:09 PM                                   |
| 139            | 39  | F   | CML                      | No                  | 5:00 AM          | 3:50 PM           | 5:30 AM          | 10:38 AM              | 4:03 PM                                   | 8:22 PM                                   |
| 142            | 56  | M   | NHL                      | No                  | 8:30 AM          | 4:15 PM           | 6:00 AM          | 12:07 PM              | 4:52 PM                                   | 8:50 PM                                   |

---

Supplementary Table 1: Information for each patient regarding sex, age, initial diagnosis, prior radiation, irradiation times, and urine collection times.

Note: Patients #51 and 86 provided only a post and pre sample, respectively

|     |                              |
|-----|------------------------------|
| NHL | Non-Hodgkin's Lymphoma       |
| ALL | Acute Lymphocytic Leukemia   |
| AML | Acute Myelogenous Leukemia   |
| CML | Chronic Myelogenous Leukemia |
| MDS | Myelodysplastic Syndrome     |

Supplementary Table 2

Potential urinary biomarkers tested but not validated through MS/MS, identity remains unknown

| Marker No. | Retention Time (min) | ESI Mode | Mass ( <i>m/z</i> ) Found | Markers tested but not validated through MS/MS<br><i>NCA= potential markers not commercially available</i> | K-S<br><i>P</i> -value |
|------------|----------------------|----------|---------------------------|------------------------------------------------------------------------------------------------------------|------------------------|
| 1          | 4.79                 | pos      | 331.2273                  | 11-Deoxycorticosterone, 17alpha-Hydroxyprogesterone                                                        | 0.0005                 |
| 2          | 0.79                 | pos      | 151.0611                  | D-Ribose                                                                                                   | 0.01                   |
| 3          | 1.29                 | pos      | 180.0879                  | D-Glucosamine                                                                                              | 0.03                   |
| 4          | 2.20                 | pos      | 129.0653                  | Dihydrothymine                                                                                             | 0.03                   |
| 5          | 0.34                 | pos      | 152.0567                  | Guanine, <i>8-Hydroxyadenine (NCA)</i> , <i>2-Hydroxyadenine (NCA)</i>                                     | 0.04                   |
| 6          | 5.00                 | neg      | 525.2716                  | Desmosine                                                                                                  | 1.17E-06               |
| 7          | 0.31                 | neg      | 179.0549                  | alpha-D-Glucose                                                                                            | 0.0006                 |
| 8          | 0.51                 | neg      | 260.0373                  | Phosphotyrosine                                                                                            | 0.0007                 |
| 9          | 0.44                 | neg      | 128.0342                  | 5-Oxo-D-proline, <i>Pyrroline hydroxycarboxylic acid (NCA)</i>                                             | 0.001                  |
| 10         | 4.03                 | neg      | 122.0237                  | Nicotinate                                                                                                 | 0.002                  |
| 11         | 0.54                 | neg      | 103.0388                  | 2-Hydroxybutyric acid, 3-Hydroxybutyric acid                                                               | 0.003                  |
| 12         | 0.33                 | neg      | 124.9907                  | Isethionic acid                                                                                            | 0.007                  |
| 13         | 0.33                 | neg      | 243.0606                  | Uridine, Pseudouridine                                                                                     | 0.01                   |
| 14         | 0.35                 | neg      | 191.0185                  | Citrate, Isocitrate                                                                                        | 0.01                   |
| 15         | 0.34                 | neg      | 427.0106                  | Inosine 5'-diphosphate                                                                                     | 0.02                   |
| 16         | 0.32                 | neg      | 135.0285                  | Threonate, <i>Erythronic acid (NCA)</i>                                                                    | 0.02                   |

List of chemicals that were tested but not verified for each ion found to be statistically significant.
