# Supplementary material
Source: PubMed Central journal article supplement (PMC4071158)
Supplement: NIHMS591254-supplement-Supplementary_file_2.pdf [file NIHMS591254-supplement-Supplementary_file_2.pdf]

Sup. Fig. 1

Creatinine

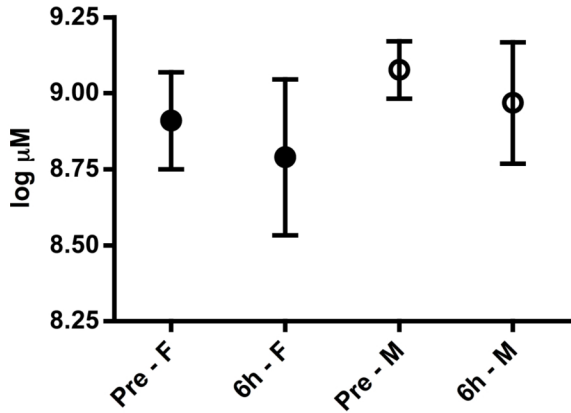

Creatinine

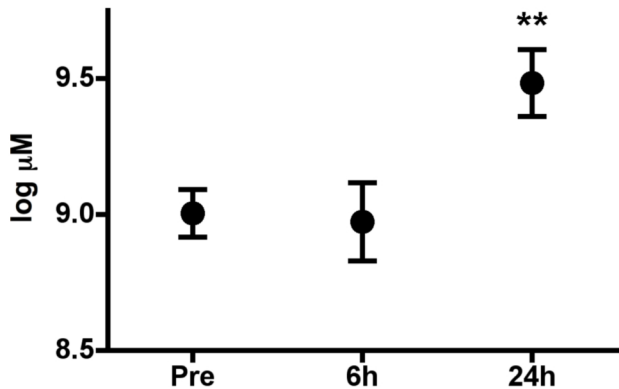

Putative Metabolite Hits by KEGG Pathway

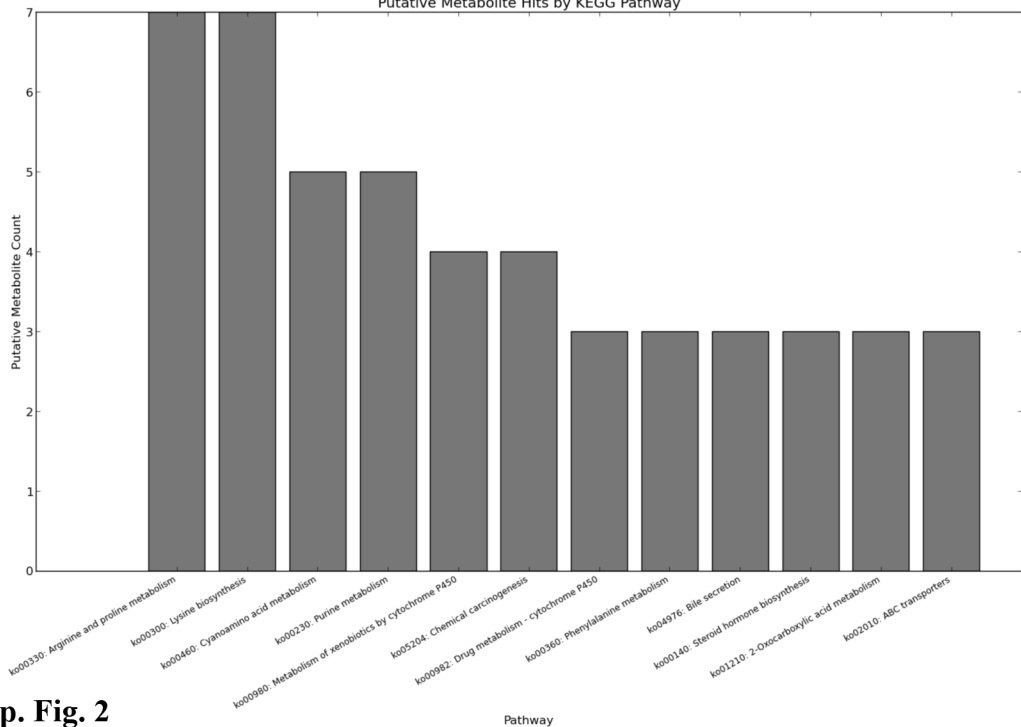

Sup. Fig. 2

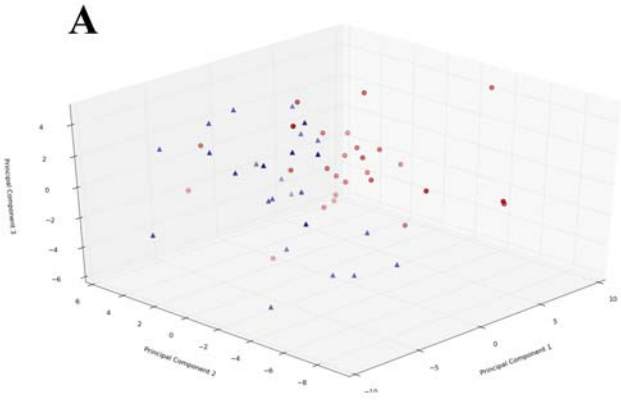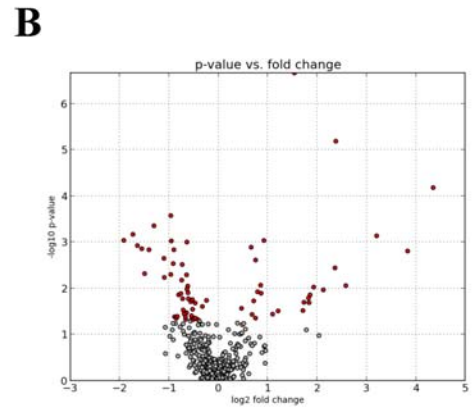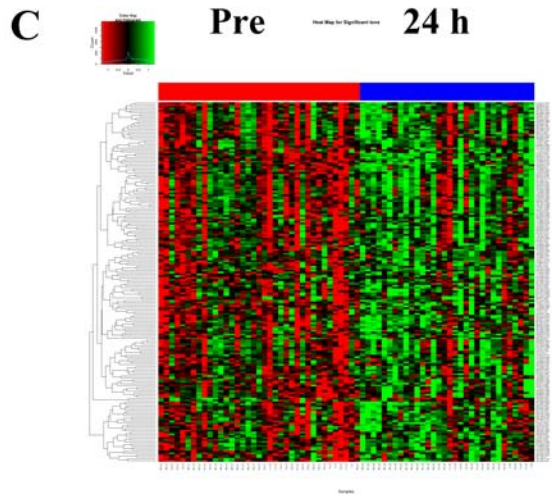

Sup. Fig. 3

**Sup. Fig. 4****Decanoylcarnitine**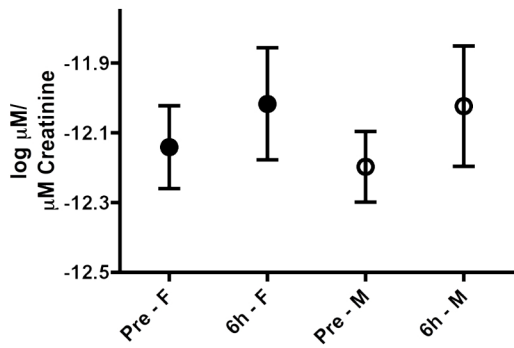**Decanoylcarnitine**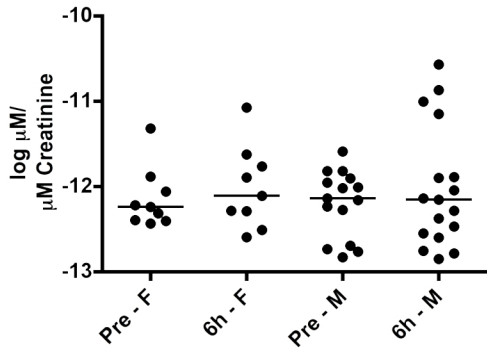**Octanoylcarnitine**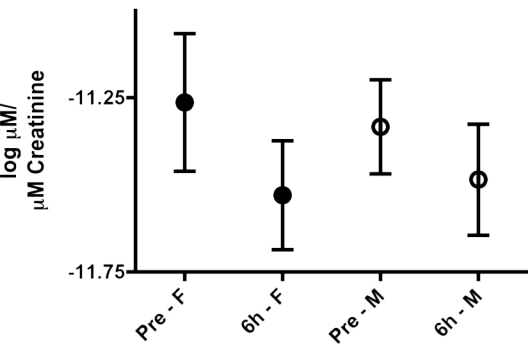**Octanoylcarnitine**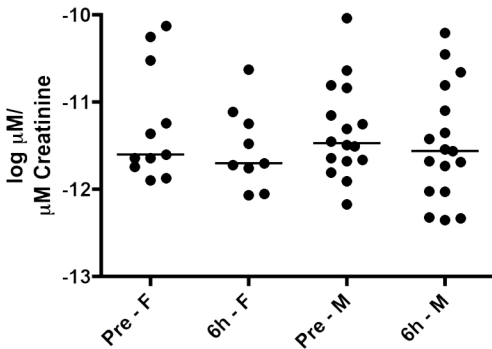

**Acetylcarnitine**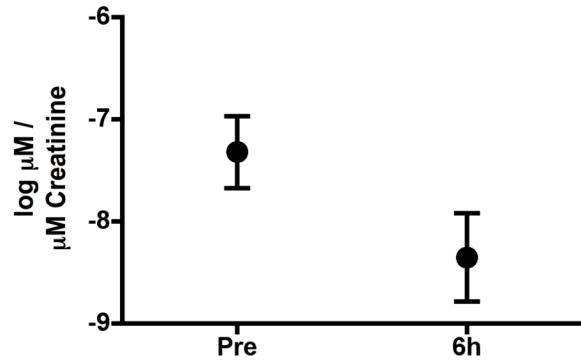**Decanoylcarnitine**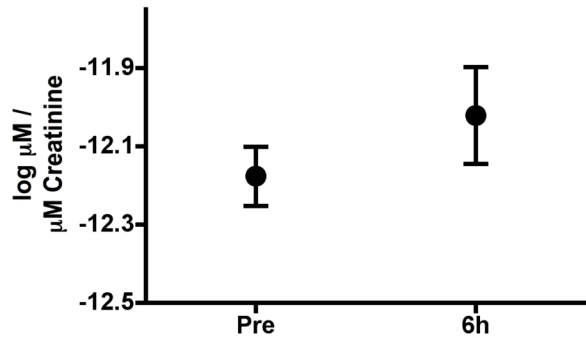**Octanoylcarnitine**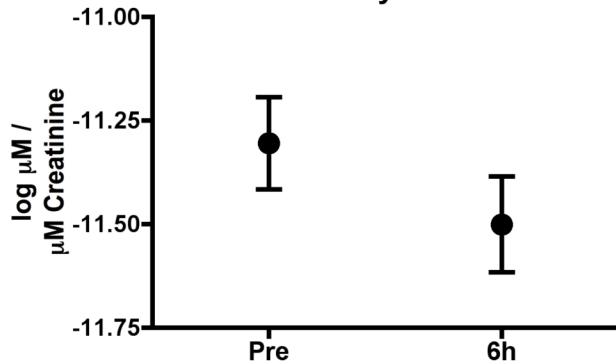**Trimethyl-L-Lysine**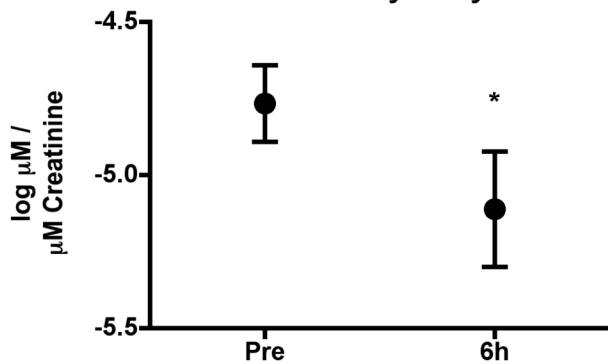**Sup. Fig. 5**

### Hypoxanthine

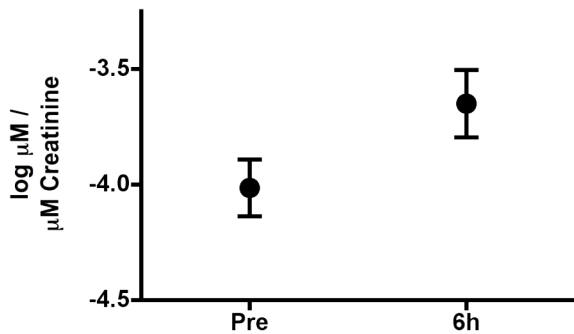

### Xanthine

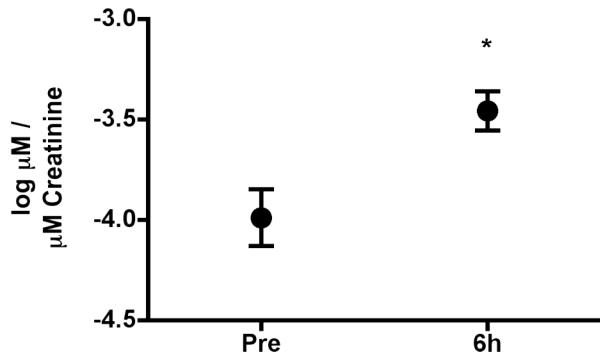

### Uric Acid

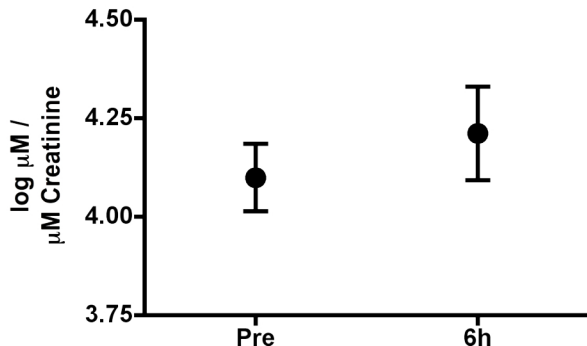

Sup. Fig. 6
